# Supplementary material
Source: publisher figshare collection journal article supplement (https://gsajournals.figshare.com/ndownloader/files/13639271)
Supplement: Supplementary file 1 [file 13639271]

## Sheet: TableS2
Table S2: Gene Ontology biological processes over-represented by genes differentially transcribed (FDR < 0.05) at 10 µg/L doses of copper exposure. GO ID = Gene Ontology process identification number, NDE = Number of differentially expressed genes with GO annotation, NTotal = Total number of genes with GO annotation, FDR = false discovery rate.
GO ID	Description	NDE	NTotal	FDR
GO:1901652	response to peptide	12	551	0.000154805
GO:1901701	cellular response to oxygen-containing compound	15	1196	0.000601462
GO:0051173	positive regulation of nitrogen compound metabolic process	22	2818	0.000601462
GO:0071495	cellular response to endogenous stimulus	17	1613	0.000601462
GO:0043067	regulation of programmed cell death	18	1830	0.000601462
GO:0010604	positive regulation of macromolecule metabolic process	22	2968	0.000826348
GO:0002682	regulation of immune system process	16	1536	0.000826348
GO:0010941	regulation of cell death	18	1975	0.000826348
GO:0006915	apoptotic process	18	1980	0.000826348
GO:0009719	response to endogenous stimulus	18	1976	0.000826348
GO:0071417	cellular response to organonitrogen compound	11	660	0.000826348
GO:0070887	cellular response to chemical stimulus	22	3037	0.000826348
GO:0071310	cellular response to organic substance	20	2490	0.000826348
GO:0012501	programmed cell death	19	2245	0.000831492
GO:0009725	response to hormone	14	1191	0.000999979
GO:0009893	positive regulation of metabolic process	23	3427	0.00110583
GO:0031325	positive regulation of cellular metabolic process	22	3137	0.00110583
GO:1901700	response to oxygen-containing compound	17	1852	0.00120112
GO:0008219	cell death	19	2380	0.00151925
GO:0010243	response to organonitrogen compound	13	1082	0.00164961
GO:1902107	positive regulation of leukocyte differentiation	6	165	0.00168958
GO:0051247	positive regulation of protein metabolic process	16	1705	0.00168958
GO:0001775	cell activation	12	956	0.00218433
GO:0001817	regulation of cytokine production	10	628	0.00218433
GO:1903708	positive regulation of hemopoiesis	7	267	0.00224484
GO:1901699	cellular response to nitrogen compound	11	804	0.0026478
GO:0048511	rhythmic process	8	395	0.00347955
GO:0010033	response to organic substance	21	3161	0.00422172
GO:0002763	positive regulation of myeloid leukocyte differentiation	4	59	0.0051395
GO:0001816	cytokine production	10	711	0.00543954
GO:0007519	skeletal muscle tissue development	6	206	0.00549343
GO:1901698	response to nitrogen compound	13	1261	0.00565681
GO:0002684	positive regulation of immune system process	11	910	0.00662463
GO:0050865	regulation of cell activation	8	472	0.00847795
GO:0043434	response to peptide hormone	8	467	0.00910102
GO:0045597	positive regulation of cell differentiation	13	1347	0.00927551
GO:0060538	skeletal muscle organ development	7	346	0.00949302
GO:0008283	cell proliferation	16	2026	0.00949302
GO:0009607	response to biotic stimulus	11	978	0.0109256
GO:0045933	positive regulation of muscle contraction	4	75	0.0126526
GO:1903706	regulation of hemopoiesis	8	509	0.012769
GO:0032101	regulation of response to external stimulus	11	1008	0.0133412
GO:0048660	regulation of smooth muscle cell proliferation	5	156	0.0140557
GO:1902531	regulation of intracellular signal transduction	15	1885	0.0146208
GO:0080134	regulation of response to stress	14	1672	0.016632
GO:0033002	muscle cell proliferation	6	266	0.016632
GO:0061061	muscle structure development	12	1245	0.0176678
GO:0048659	smooth muscle cell proliferation	5	169	0.0177289
GO:0048584	positive regulation of response to stimulus	16	2176	0.0177289
GO:0045321	leukocyte activation	9	718	0.0181625
GO:0002040	sprouting angiogenesis	4	90	0.0181625
GO:0051241	negative regulation of multicellular organismal process	13	1481	0.018173
GO:0010942	positive regulation of cell death	10	886	0.018173
GO:2000145	regulation of cell motility	11	1086	0.0186634
GO:0009605	response to external stimulus	18	2736	0.0186634
GO:0009890	negative regulation of biosynthetic process	14	1729	0.0186634
GO:0001503	ossification	8	554	0.0186634
GO:1903530	regulation of secretion by cell	10	890	0.0186879
GO:0090049	regulation of cell migration involved in sprouting angiogenesis	3	37	0.0186879
GO:0032879	regulation of localization	19	3042	0.0186879
GO:0046890	regulation of lipid biosynthetic process	5	179	0.0193208
GO:0070555	response to interleukin-1	4	98	0.0193208
GO:0051240	positive regulation of multicellular organismal process	15	1988	0.0193208
GO:0031099	regeneration	6	296	0.0204412
GO:0033993	response to lipid	10	931	0.0204412
GO:1901214	regulation of neuron death	7	430	0.0204412
GO:0002042	cell migration involved in sprouting angiogenesis	3	40	0.0211458
GO:0006952	defense response	13	1521	0.0211458
GO:0045595	regulation of cell differentiation	16	2274	0.0211458
GO:0060537	muscle tissue development	9	755	0.0214288
GO:1903426	regulation of reactive oxygen species biosynthetic process	4	103	0.0216507
GO:2000026	regulation of multicellular organismal development	17	2552	0.0221882
GO:0080090	regulation of primary metabolic process	24	4723	0.0223736
GO:0014070	response to organic cyclic compound	10	952	0.0229412
GO:0002831	regulation of response to biotic stimulus	6	314	0.0232859
GO:0043207	response to external biotic stimulus	10	951	0.0232859
GO:1902105	regulation of leukocyte differentiation	6	323	0.0232859
GO:0051094	positive regulation of developmental process	14	1818	0.0232859
GO:0031323	regulation of cellular metabolic process	25	5114	0.0232859
GO:2000377	regulation of reactive oxygen species metabolic process	5	203	0.0232859
GO:0043523	regulation of neuron apoptotic process	6	316	0.0232859
GO:0030334	regulation of cell migration	10	971	0.0248927
GO:0051046	regulation of secretion	10	964	0.0252176
GO:0032270	positive regulation of cellular protein metabolic process	13	1605	0.0253318
GO:0006950	response to stress	22	4086	0.0256071
GO:0007517	muscle organ development	8	630	0.0293845
GO:1902533	positive regulation of intracellular signal transduction	10	996	0.0305399
GO:0042127	regulation of cell proliferation	13	1640	0.0305399
GO:1903524	positive regulation of blood circulation	4	117	0.0305399
GO:0070997	neuron death	7	486	0.0305399
GO:0019216	regulation of lipid metabolic process	6	341	0.0305399
GO:0043068	positive regulation of programmed cell death	9	823	0.0305399
GO:0045937	positive regulation of phosphate metabolic process	11	1210	0.0305399
GO:0060548	negative regulation of cell death	11	1208	0.0305399
GO:0033554	cellular response to stress	16	2415	0.0305399
GO:0048522	positive regulation of cellular process	24	4889	0.0305399
GO:0010562	positive regulation of phosphorus metabolic process	11	1218	0.0305399
GO:0031347	regulation of defense response	9	826	0.0305399
GO:0042981	regulation of apoptotic process	13	1658	0.0305399
GO:0060255	regulation of macromolecule metabolic process	24	4886	0.0305399
GO:0051270	regulation of cellular component movement	11	1227	0.0305399
GO:0051402	neuron apoptotic process	6	347	0.0305399
GO:0007165	signal transduction	22	4225	0.0305399
GO:1903670	regulation of sprouting angiogenesis	3	52	0.0310833
GO:0009889	regulation of biosynthetic process	20	3559	0.0311137
GO:0043534	blood vessel endothelial cell migration	4	125	0.0311644
GO:1903409	reactive oxygen species biosynthetic process	4	126	0.0315252
GO:0010647	positive regulation of cell communication	14	1925	0.0316159
GO:0002376	immune system process	17	2703	0.0316159
GO:0051249	regulation of lymphocyte activation	6	365	0.0316159
GO:0040012	regulation of locomotion	11	1241	0.0316159
GO:0043542	endothelial cell migration	5	233	0.0329996
GO:0023056	positive regulation of signaling	14	1940	0.0333562
GO:0051171	regulation of nitrogen compound metabolic process	23	4597	0.0340802
GO:0051246	regulation of protein metabolic process	17	2754	0.0350057
GO:0051239	regulation of multicellular organismal process	20	3628	0.0362216
GO:0062012	regulation of small molecule metabolic process	8	677	0.03665
GO:0046683	response to organophosphorus	4	139	0.0374898
GO:0042327	positive regulation of phosphorylation	10	1064	0.038291
GO:1903037	regulation of leukocyte cell-cell adhesion	5	252	0.0391867
GO:0030155	regulation of cell adhesion	9	875	0.039377
GO:0014706	striated muscle tissue development	8	703	0.0409427
GO:0007623	circadian rhythm	5	250	0.0411433
GO:0032268	regulation of cellular protein metabolic process	16	2532	0.0411982
GO:0042221	response to chemical	22	4323	0.0411982
GO:2000142	regulation of DNA-templated transcription, initiation	3	64	0.0415037
GO:0002237	response to molecule of bacterial origin	5	255	0.0421688
GO:0071375	cellular response to peptide hormone stimulus	6	383	0.0421688
GO:0009611	response to wounding	9	888	0.0425956
GO:0007166	cell surface receptor signaling pathway	16	2540	0.043264
GO:0098609	cell-cell adhesion	8	717	0.0432752
GO:0032940	secretion by cell	11	1303	0.0444157
GO:0010646	regulation of cell communication	19	3430	0.0444157
GO:0014074	response to purine-containing compound	4	153	0.0482584
GO:0023052	signaling	24	5112	0.0482947
GO:0051707	response to other organism	9	918	0.0489293
GO:0051716	cellular response to stimulus	26	5881	0.0490775
